# Supplementary material for: An allocentric human odometer for perceiving distances on the ground plane
Source: eLife. 2024 Jul 18;12:RP88095. doi: 10.7554/eLife.88095 (PMC11257686; doi:10.7554/eLife.88095)
Supplement: Figure 3—source data 1. [file elife-88095-fig3-data1.xlsx]

## Sheet: Figure 3c–Source Data 1
a. Walking (12sec)
	Target distance D	Target height H	Juadged distance D'	Judged height H'	Standard err of D'	Standard err of H'
	300	0	284.625	6.1875	12.5774	2.78285
	425	0	347.667	30.6667	14.9874	4.18235
	525	0	401.583	62.0833	21.437	7.38287
	650	0	451.542	84.9583	23.024	11.6334
	650	50	461.75	112.062	19.5532	5.66986
	650	159.5	456.438	170.062	18.8161	3.89589
b. Baseline-staytionary (12sec)
	Target distance D	Target height H	Juadged distance D'	Judged height H'	Standard err of D'	Standard err of H'
	300	0	317.562	2	12.2514	1.61624
	425	0	416.917	21.8333	11.6659	3.48889
	525	0	497.5	52.7083	16.4002	6.18954
	650	0	556.292	74.75	22.7078	8.44745
	650	50	582.062	108.75	25.4617	8.40129
	650	159.5	589.375	169.062	25.9524	4.21058
c. Walking (60sec)
	Target distance D	Target height H	Juadged distance D'	Judged height H'	Standard err of D'	Standard err of H'
	300	0	318.875	2.625	13.0407	1.64363
	425	0	407.875	35.7917	11.3015	5.79113
	525	0	486.333	66.125	19.4125	9.15771
	650	0	549.167	78.4167	26.1013	8.78536
	650	50	562.688	115.875	20.4939	8.52413
	650	159.5	562.375	168.562	25.8478	4.35473
d. Baseline-staytionary (60sec)
	Target distance D	Target height H	Juadged distance D'	Judged height H'	Standard err of D'	Standard err of H'
	300	0	316.938	2.0625	14.2508	2.20491
	425	0	419.833	23.2917	14.2347	4.41161
	525	0	497.375	59.0417	13.3943	8.12835
	650	0	558.417	75.875	18.9181	9.5959
	650	50	598.562	114	24.5655	5.57418
	650	159.5	586	167.812	29.0389	4.39032
Note:
Mean eye height: 159.5 cm
unit: cm

## Sheet: Figure 3d–Source Data 1
a. divided attention walking
	Target distance D	Target height H	Juadged distance D'	Judged height H'	Standard err of D'	Standard err of H'
	300	0	324.625	2.125	12.4178	1.46298
	425	0	438.458	25.5833	17.5844	6.84813
	525	0	509.417	54.25	20.1963	6.59717
	650	0	556.958	85.8333	29.929	7.09732
	650	50	581.562	114.188	28.9506	5.77463
	650	159	571.25	170.25	27.1819	3.86771
b. baseline-stationary
	Target distance D	Target height H	Juadged distance D'	Judged height H'	Standard err of D'	Standard err of H'
	300	0	342.188	2.5	17.8949	1.16905
	425	0	437.042	21.9167	20.2175	4.57329
	525	0	506.5	55.125	18.949	8.90105
	650	0	570.542	84.625	27.0299	6.38502
	650	50	586.875	110.875	28.8778	6.03201
	650	159	583.188	169.188	28.6171	3.54121
Note:
Mean eye height: 159cm
unit: cm

## Sheet: Figure 3e–Source Data 1
a. Walking (12sec)
	Target distance D (cm)	Target height H (cm)	Physical angle of declination (deg)	Judged angle of declination (deg)	Standard err of AOD'
	300	0	28.0097	28.657	1.36517
	425	0	20.5825	20.525	1.11691
	525	0	16.91	14.0623	1.62469
	650	0	13.7965	9.84075	1.93276
	650	50	9.57232	6.05096	0.856326
	650	159.5	0	-1.2709	0.447445
b. Baseline-staytionary (12sec)
	Target distance D (cm)	Target height H (cm)	Physical angle of declination (deg)	Judged angle of declination (deg)	Standard err of AOD'
	300	0	28.0097	26.6017	1.01302
	425	0	20.5825	18.4209	0.871038
	525	0	16.91	12.2759	0.973498
	650	0	13.7965	8.79811	0.967215
	650	50	9.57232	5.16223	1.0221
	650	159.5	0	-0.885561	0.312366
c. Walking (60sec)
	Target distance D (cm)	Target height H (cm)	Physical angle of declination (deg)	Judged angle of declination (deg)	Standard err of AOD'
	300	0	28.0097	26.4096	0.958063
	425	0	20.5825	16.9705	0.753151
	525	0	16.91	11.1472	1.37033
	650	0	13.7965	8.68779	1.1896
	650	50	9.57232	4.63586	1.11624
	650	159.5	0	-0.88931	0.356064
d. Baseline-staytionary (60sec)
	Target distance D (cm)	Target height H (cm)	Physical angle of declination (deg)	Judged angle of declination (deg)	Standard err of AOD'
	300	0	28.0097	26.7212	1.27814
	425	0	20.5825	18.2339	0.996552
	525	0	16.91	11.5092	0.96389
	650	0	13.7965	8.65113	1.10897
	650	50	9.57232	4.47511	0.707859
	650	159.5	0	-0.75113	0.36481
Note:
Mean eye height: 159.5cm
unit: deg

## Sheet: Figure 3f–Source Data 1
a. divided attention walking
	Target distance D (cm)	Target height H (cm)	Physical angle of declination (deg)	Judged angle of declination (deg)	Standard err of AOD'
	300	0	27.917	26.0108	1.00927
	425	0	20.5088	17.1685	1.12998
	525	0	16.8476	11.7746	0.892713
	650	0	13.7446	7.79117	1.06908
	650	50	9.51879	4.65227	0.771335
	650	159	0	-1.10355	0.211519
b. baseline-stationary
	Target distance D (cm)	Target height H (cm)	Physical angle of declination (deg)	Judged angle of declination (deg)	Standard err of AOD'
	300	0	27.917	24.8147	1.11928
	425	0	20.5088	17.8335	1.09792
	525	0	16.8476	11.8797	1.07913
	650	0	13.7446	7.63245	0.89848
	650	50	9.51879	4.8998	0.793998
	650	159	0	-0.97598	0.23264
Note:
Mean eye height: 159cm
unit: deg
