# Supplementary material for: An allocentric human odometer for perceiving distances on the ground plane
Source: eLife. 2024 Jul 18;12:RP88095. doi: 10.7554/eLife.88095 (PMC11257686; doi:10.7554/eLife.88095)
Supplement: Figure 4—source data 1. [file elife-88095-fig4-data1.xlsx]

## Sheet: Figure 4a–Source Data 1
a. Baseline-stationary
	Target distance D	Target height H	Juadged distance D'	Judged height H'	Standard err of D'	Standard err of H'
	300	0	354.188	1.125	14.028	0.935414
	425	0	463.938	23.0625	25.7442	3.84315
	525	0	539.75	57.2188	15.572	7.99162
	650	0	604.625	80	25.4279	8.74934
	650	50	620	106.312	21.4887	8.22759
	650	156.625	608	169.375	18.7775	3.61403
b. Walking
	Target distance D	Target height H	Juadged distance D'	Judged height H'	Standard err of D'	Standard err of H'
	300	0	311.438	0.4375	13.1395	0.467707
	425	0	406.094	22.3438	13.731	5.99956
	525	0	442.844	62.4062	20.5567	8.59505
	650	0	463.844	82.6562	21.1237	9.56075
	650	50	500.188	116.125	18.979	5.71942
	650	156.625	476.438	168.812	17.0036	3.48201
c. Vestibular-forward
	Target distance D	Target height H	Juadged distance D'	Judged height H'	Standard err of D'	Standard err of H'
	300	0	307.188	1.4375	12.8194	1.14926
	425	0	398.906	30.6562	15.0528	5.27894
	525	0	449.906	51.4375	18.4714	7.3758
	650	0	467.938	83.8438	16.6412	9.89008
	650	50	496.125	107.188	20.4288	7.39204
	650	156.625	486.688	170.312	17.8139	3.88375
Note:
Mean eye height: 156.63 cm
unit: cm

## Sheet: Figure 4b–Source Data 1
a. Baseline-stationary
	Target distance D	Target height H	Juadged distance D'	Judged height H'	Standard err of D'	Standard err of H'
	300	0	330.875	0.9375	4.15761	0.994244
	425	0	419	23	9.80879	2.91613
	525	0	466.458	61.5833	6.3931	2.25864
	650	0	524.125	82.0833	8.25742	3.61647
	650	50	535.938	121.062	12.1646	3.28707
	650	159.875	515.938	167.625	12.4158	4.00191
b. Vestibular-backward
	Target distance D	Target height H	Juadged distance D'	Judged height H'	Standard err of D'	Standard err of H'
	300	0	382.625	1.125	6.63786	1.70084
	425	0	511.042	18.375	6.46577	2.71617
	525	0	583.417	51.7083	2.39654	4.57662
	650	0	639.042	78.5417	6.19282	3.50461
	650	50	670.438	112	7.44015	4.01782
	650	159.875	654.875	169.812	12.0634	0.94153
Note:
Mean eye height: 159.88 cm
unit: cm

## Sheet: Figure 4c–Source Data 1
a. Baseline-stationary
	Target distance D (cm)	Target height H (cm)	Physical angle of declination (deg)	Judged angle of declination (deg)	Standard err of AOD'
	300	0	27.5678	23.9402	0.957513
	425	0	20.2301	16.5906	1.416
	525	0	16.6115	10.5669	1.01208
	650	0	13.5477	7.35175	0.95627
	650	50	9.31569	4.76203	0.874158
	650	156.625	0	-1.18298	0.344673
b. Walking
	Target distance D (cm)	Target height H (cm)	Physical angle of declination (deg)	Judged angle of declination (deg)	Standard err of AOD'
	300	0	27.5678	26.8462	0.977197
	425	0	20.2301	18.5542	1.22036
	525	0	16.6115	12.3623	1.41156
	650	0	13.5477	9.4879	1.55922
	650	50	9.31569	4.7253	0.77231
	650	156.625	0	-1.41739	0.419903
c. Vestibular-forward
	Target distance D (cm)	Target height H (cm)	Physical angle of declination (deg)	Judged angle of declination (deg)	Standard err of AOD'
	300	0	27.5678	27.113	1.11923
	425	0	20.2301	17.7639	1.08011
	525	0	16.6115	13.4573	1.29049
	650	0	13.5477	9.13129	1.46249
	650	50	9.31569	5.81384	0.98207
	650	156.625	0	-1.57193	0.473289
Note:
Mean eye height: 156.63 cm
unit: deg

## Sheet: Figure 4d–Source Data 1
a. Baseline-stationary
	Target distance D (cm)	Target height H (cm)	Physical angle of declination (deg)	Judged angle of declination (deg)	Standard err of AOD'
	300	0	28.047	25.839	0.451184
	425	0	20.612	18.372	0.366676
	525	0	16.9349	11.8555	0.297159
	650	0	13.8173	8.51933	0.401906
	650	50	9.59375	4.18496	0.301423
	650	159.875	0	-0.974655	0.366632
b. Vestibular-backward
	Target distance D (cm)	Target height H (cm)	Physical angle of declination (deg)	Judged angle of declination (deg)	Standard err of AOD'
	300	0	28.047	22.6984	0.439886
	425	0	20.612	15.5961	0.224145
	525	0	16.9349	10.5574	0.382454
	650	0	13.8173	7.22492	0.229166
	650	50	9.59375	4.09168	0.420436
	650	159.875	0	-0.896532	0.111954
Note:
Mean eye height: 159.88 cm
unit: deg

## Sheet: Figure 4e–Source Data 1
a. Baseline-stationary
	Target distance D	Target height H	Physical eye-to-target distance P	Reported eye-to-target distance P'	Standard err of P'
	300	0	340.277	273.13	13.7771
	425	0	454.331	359.47	23.4147
	525	0	549.016	480.682	19.7927
	650	0	669.548	550.485	25.0449
	650	160.5	650	503.203	17.5843
b. Vestibular-forward
	Target distance D	Target height H	Physical eye-to-target distance P	Reported eye-to-target distance P'	Standard err of P'
	300	0	340.277	230.183	10.7952
	425	0	454.331	307.445	12.7322
	525	0	549.016	342.168	22.1728
	650	0	669.548	419.848	22.8414
	650	160.5	650	380.107	17.0028
Note:
Mean eye height: 160.5 cm
unit: cm
