# Supplementary material for: An allocentric human odometer for perceiving distances on the ground plane
Source: eLife. 2024 Jul 18;12:RP88095. doi: 10.7554/eLife.88095 (PMC11257686; doi:10.7554/eLife.88095)
Supplement: Figure 5—source data 1. [file elife-88095-fig5-data1.xlsx]

## Sheet: Figure 5a–Source Data 1
a. Baseline-stationary
	Target distance D	Target height H	Juadged distance D'	Judged height H'	Standard err of D'	Standard err of H'
	325	0	318.514	16.75	10.1006	5.07272
	450	0	395.333	35.6806	15.9906	6.06212
	575	0	447.208	58.1667	21.1029	8.4952
	700	0	479.528	74.7917	26.7589	8.72971
	575	157.944	478.833	166.792	29.0771	4.3604
b. Stepladder
	Target distance D	Target height H	Juadged distance D'	Judged height H'	Standard err of D'	Standard err of H'
	325	0	275.389	18.1944	10.2039	6.79524
	450	0	332.667	39.3889	15.277	6.77932
	575	0	376.75	60.75	23.7813	10.0078
	700	0	407.056	76.6944	29.7557	10.891
	575	157.944	401.528	166	24.0071	4.5117
c. Horizontal-walking
	Target distance D	Target height H	Juadged distance D'	Judged height H'	Standard err of D'	Standard err of H'
	325	0	275.806	16.2778	9.28086	4.53275
	450	0	331.056	40.6667	17.9163	5.78539
	575	0	365.556	66.0833	20.2356	10.8007
	700	0	391	82.9444	24.2326	8.80704
	575	157.944	398.806	166.722	25.3122	4.81381
Note:
Mean eye height: 157.94 cm
unit: cm

## Sheet: Figure 5b–Source Data 1
a. Baseline-stationary
	Target distance D (cm)	Target height H (cm)	Physical angle of declination (deg)	Judged angle of declination (deg)	Standard err of AOD'
	325	0	25.903	23.9862	0.847243
	450	0	19.3331	17.2581	0.763583
	575	0	15.3557	12.5862	0.776984
	700	0	12.7128	9.81462	0.70466
	575	157.944	0	-1.09451	0.252114
b. Stepladder
	Target distance D (cm)	Target height H (cm)	Physical angle of declination (deg)	Judged angle of declination (deg)	Standard err of AOD'
	325	0	25.903	26.8888	0.971681
	450	0	19.3331	19.6422	0.941407
	575	0	15.3557	14.3508	1.14186
	700	0	12.7128	11.2012	1.10381
	575	157.944	0	-1.19268	0.316092
c. Horizontal-walking
	Target distance D (cm)	Target height H (cm)	Physical angle of declination (deg)	Judged angle of declination (deg)	Standard err of AOD'
	325	0	25.903	27.2822	0.900381
	450	0	19.3331	19.6438	0.698288
	575	0	15.3557	13.9654	1.0851
	700	0	12.7128	10.7904	0.725832
	575	157.944	0	-1.30389	0.306131
Note:
Mean eye height: 157.94 cm
unit: deg
